# Supplementary material for: Divergent mechanisms regulate conserved cardiopharyngeal development and gene expression in distantly related ascidians
Source: eLife. 2014 Sep 10;3:e03728. doi: 10.7554/eLife.03728 (PMC4356046; doi:10.7554/eLife.03728)
Supplement: Supplementary file 2. — Table of newly proposed tunicate gene names and symbols (Stolfi et al., 2014), and their aliases and synonyms. DOI: http://dx.doi.org/10.7554/eLife.03728.030 [file elife03728s002.xlsx]

## Sheet: Sheet1
New gene symbols used in this study	Synonyms
Dlx.a	Dlx-a, Dlxa, Dll-A
Ebf	COE
Ets.b	Ets, Ets1/2, Ets/pointed 2
Foxd.a	FoxD, FoxD-a
Foxf	FoxF
Gata4/5/6	GATA-a
Hand-related	NoTrlc, Hand-like, Handx, Scleraxis
Lhx3/4	Lhx3, Lim3
Mesp	Mesogenin, MesP
Nk4	Nkx2-5, Nkx, tinman
Rhod/f	Rif
Sox1/2/3	SoxB1
Tbx1/10	Tbx1
Tbx6-related.a	Tbx6-a
Tbx6-related.b	Tbx6-b
Aldh1a.a	Raldh2, Aldh1a1/2/3a
